# Supplementary material for: miR-8 controls synapse structure by repression of the actin regulator Enabled
Source: PubMed Central journal article supplement (PMC3994775; doi:10.1242/dev.105791), 2014-05
Supplement: supp_141.9.1864_DEV105791.pdf [file supp_141.9.1864_DEV105791.pdf]

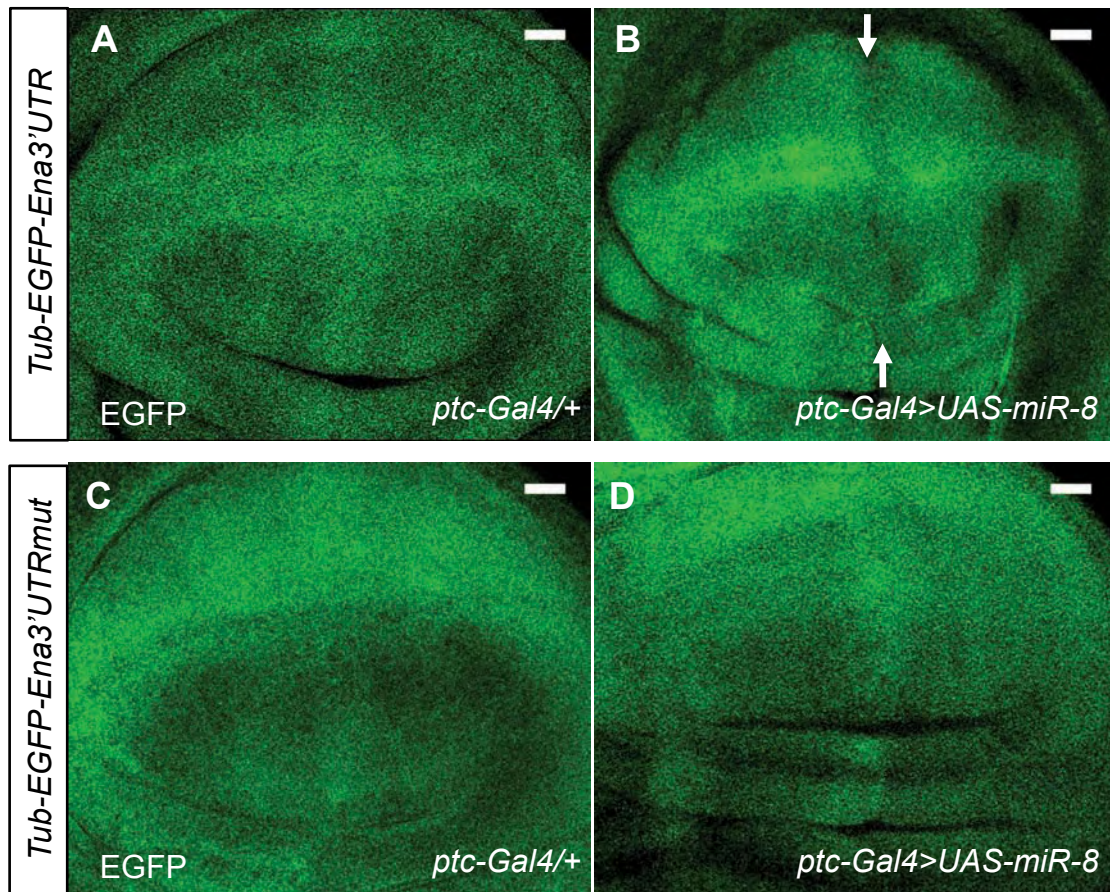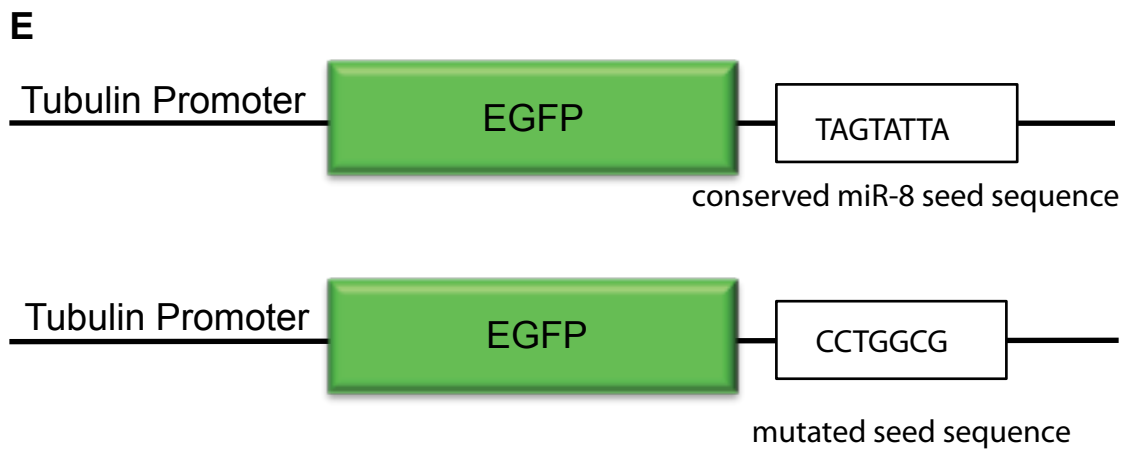

**Supplemental Figure 1. Ena is an *in vivo* target of miR-8.** (A-D) Images of third instar larval wing imaginal discs of *tub-EGFP-Ena3'UTR* and *tub-EGFP-Ena3'UTRmut* animals in a *ptc-Gal4* (A, B) or *ptc-Gal4>UAS-miR-8* expressing background (C, D), immunostained with an EGFP antibody. Cells expressing miR-8 along the anterior-posterior boundary of the wing pouch, indicated by white arrows display reduced levels of EGFP in B. Decrease in EGFP levels is not observed in D.

## HRP (Neuron) / Ena

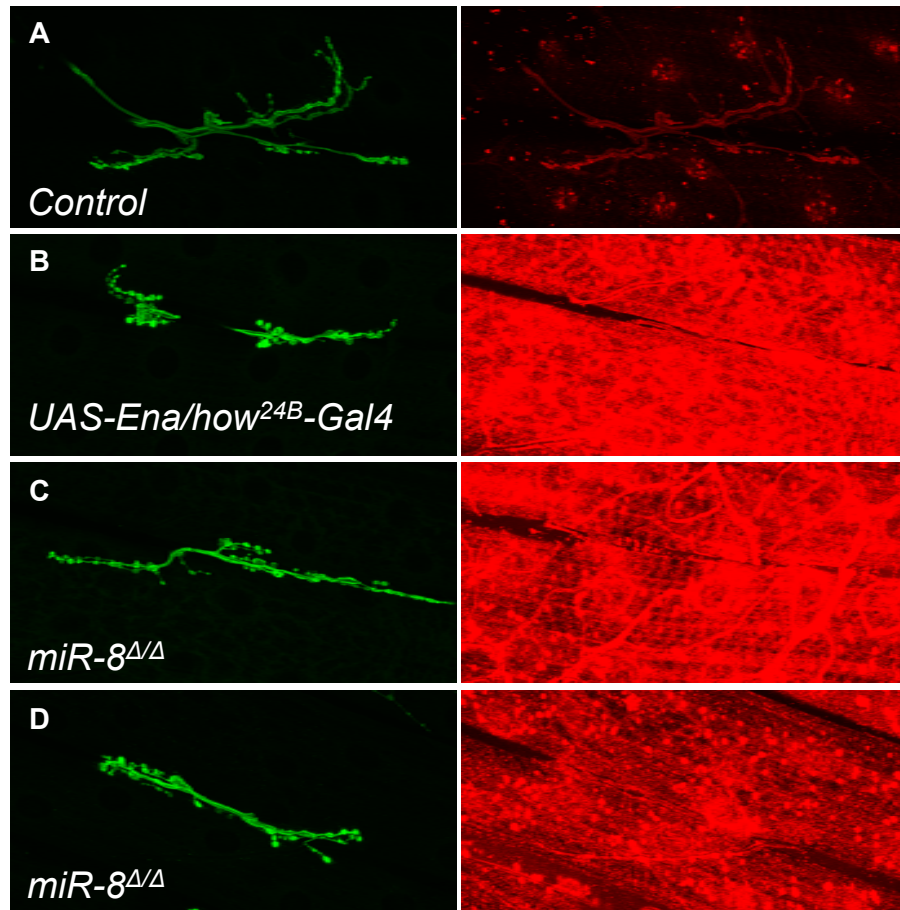

**Supplemental Figure 2. Ena is highly over-expressed in muscle of miR-8 null animals.** Images of *Drosophila* 6/7 NMJs immunostained with HRP (green) and Ena (red). Scale bar, 20 $\mu$ m. Ena expression in wild type control (A), over-expression of Ena with the pan-muscle *how<sup>24B</sup>-Gal4* driver (B), and miR-8 loss (*miR-8<sup>Δ/Δ</sup>*, C-D).
